# Supplementary material for: The Synergistic Effect of Lemongrass Essential Oil and Flometoquin, Flonicamid, and Sulfoxaflor on Bemisia tabaci (Genn.) (Hemiptera: Aleyrodidae): Insights into Toxicity, Biochemical Impact, and Molecular Docking
Source: MDPI journal article supplement (doi:10.3390/insects15050302), 2024-04-24
Supplement: s1 [file s1]

**Table S1.** The chemical compounds of lemongrass (*Cymbopogon citratus*) essential oil, as identified by Moustafa et al. (2021) and Moustafa et al. (2023).

| RT    | Area % | Compound name                          |
|-------|--------|----------------------------------------|
| 7.97  | 0.83   | Isoneral                               |
| 8.37  | 1.49   | Isogeranial                            |
| 8.60  | 0.71   | Dihydronopol                           |
| 9.77  | 35.00  | $\beta$ -Citral (neral)                |
| 10.47 | 35.91  | $\alpha$ -Citral (Geranial (Citral A)) |
| 10.61 | 3.58   | <i>trans</i> -Verbenol                 |
| 10.71 | 0.91   | Epoxy-linalooloxide                    |
| 10.97 | 1.45   | Geranyl vinyl ether                    |
| 11.26 | 7.84   | Nerylacetal                            |
| 11.76 | 9.08   | 5-Octyldihydro-2(3H)-furanone          |
| 12.69 | 1.24   | Geraniol acetate                       |
| 13.74 | 1.24   | (Z,E)- $\alpha$ -farnesene             |
| 16.77 | 0.72   | $\beta$ -Caryophyllene epoxide         |

RT (retention time)

**Table S2.** Analysis of variance (ANOVA) showing the differences of acetylcholine esterase (AchE), Cytochrome P450 (P450),  $\alpha$ -esterase, Glutathione S transferase (GST), enzymes specific activity, between lemongrass essential oil, flometoquin, flonicamid, and sulfoxaflor, at their LC<sub>50</sub> values, Compared to untreated check of *Bemisia tabaci* adults, at 48 h post-treatment.

| Enzyme             | <i>F(df)</i> * | <i>P</i> |
|--------------------|----------------|----------|
| AchE               | 4.48 (4,10)    | 0.02     |
| P450               | 3.74 (4,10)    | 0.04     |
| $\alpha$ -esterase | 4.84 (4,10)    | 0.02     |
| GST                | 1.62 (4,10)    | 0.24     |

\*df= degree of freedom

**Table S3.** Analysis of variance (ANOVA) showing the differences of acetylcholine esterase (AchE), Cytochrome P450 (P450),  $\alpha$ -esterase, Glutathione S transferase (GST), enzymes specific activity, between the individual treatments of lemongrass essential oil, flometoquin, flonicamid, and sulfoxaflor, at their LC<sub>25</sub> values, and the binary mixture of lemongrass essential oil, at its LC<sub>25</sub>, with flometoquin, flonicamid, or sulfoxaflor, compared to untreated check of *Bemisia tabaci* adults, at 48 h post-treatment.

| Mixtures                | AchE         |          | P450         |          | $\alpha$ -esterase |          | GST          |          |
|-------------------------|--------------|----------|--------------|----------|--------------------|----------|--------------|----------|
|                         | <i>F(df)</i> | <i>P</i> | <i>F(df)</i> | <i>P</i> | <i>F(df)</i>       | <i>P</i> | <i>F(df)</i> | <i>P</i> |
| Lemongrass/ flometoquin | 7.39(3, 8)   | 0.01     | 0.10(3, 8)   | 0.96     | 6.45 (3, 8)        | 0.01     | 4.05(3, 8)   | 0.05     |
| Lemongrass/ flonicamid  | 4.19(3, 8)   | 0.04     | 8.23(3,8)    | 0.01     | 2.66 (3, 8)        | 0.12     | 4.47(3, 8)   | 0.04     |
| Lemongrass/ sulfoxaflor | 6.48(3, 8)   | 0.015    | 4.74(3,8)    | 0.03     | 1.39 (3, 8)        | 0.31     | 2.53(3, 8)   | 0.13     |
